# Supplementary material
Source: Springer Nature journal article supplement (https://www.springerprofessional.de/resource/supplementary/40192_2012_2_MOESM11_ESM.pdf/11899466)
Supplement: MOESM11 [file 11899466]

| Item | Risk                                                                                                       | Likelihood                     | Consequence            | Rating |
|------|------------------------------------------------------------------------------------------------------------|--------------------------------|------------------------|--------|
| 1    | <b>Risk:</b> Thermal process model does not predict temperature transients accurately.                     | 3 (> 30%, Moderate)            | 3 (Moderate)           | Y      |
|      | <b>Impact:</b> Degrades all downstream analyses.                                                           | ↓                              |                        | ↓      |
|      | <b>Mitigation:</b> Add measurements to improve heat transfer predictions.                                  | 2                              | 3                      | G      |
| 2    | <b>Risk:</b> Stress relief predictions do not match measured forging data after heat treatment             | 2 (>5%, Low)                   | 3 (Moderate)           | G      |
|      | <b>Impact:</b> Some effect on residual stress magnitude predictions.                                       |                                |                        |        |
|      | <b>Mitigation:</b> None required: monitor.                                                                 |                                |                        |        |
| 3    | <b>Risk:</b> Range of microstructure and grain size predictions exceeds desired control limits             | 3 (> 30%, Moderate)            | 2 (Some impact)        | Y      |
|      | <b>Impact:</b> May affect life prediction with residual stresses                                           | ↓                              |                        | ↓      |
|      | <b>Mitigation:</b> Extend control limits; monitor production.                                              | 2 (>5%, Low)                   | 2 (Some impact)        | G      |
| 4    | <b>Risk:</b> Machining distortion requires cold-straightening and stress relief to meet final envelop      | 2 (>5%, Low)                   | 3 (Moderate)           | G      |
|      | <b>Impact:</b> Extra process & modeling step, but predictable                                              |                                |                        |        |
|      | <b>Mitigation:</b> None required: monitor.                                                                 |                                |                        |        |
| 5    | <b>Risk:</b> Uncertainty quantification indicates RS values have insufficient fidelity for life prediction | 4 (>50%, More likely than not) | 4 (Significant impact) | R      |
|      | <b>Impact:</b> Cannot include residual stress predictions directly in life predictions.                    | ↓                              | ↓                      | ↓      |
|      | <b>Mitigation:</b> Consider alternate process or use bounded rather than explicit values.                  | 3 (>30%, Moderate)             | 3 (Moderate)           | Y      |
